# Supplementary material
Source: PubMed Central journal article supplement (PMC307665)

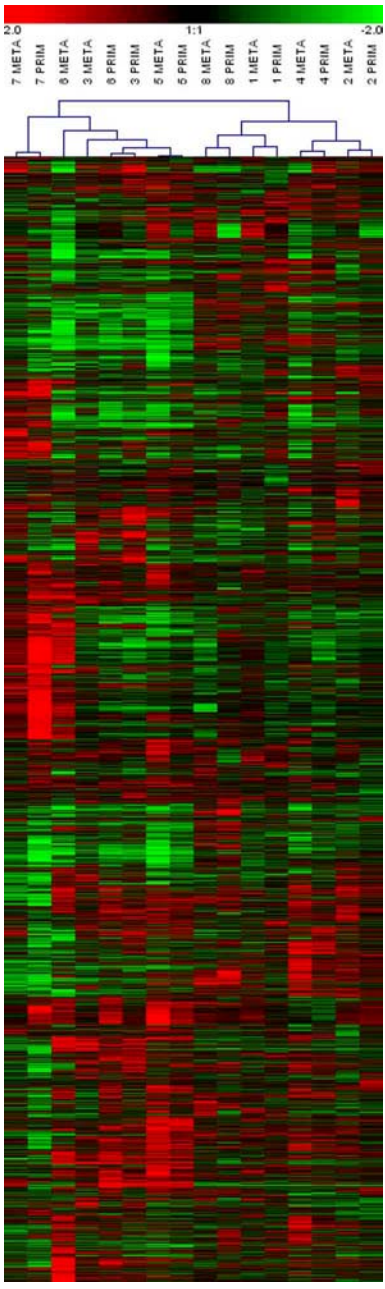

Supplement: pnas_100_26_15901__2.pdf [file pnas_100_26_15901__2.pdf]
